# Supplementary material
Source: PubMed Central journal article supplement (PMC3156570)
Supplement: NIHMS172637-supplement-supplemental.pdf [file NIHMS172637-supplement-supplemental.pdf]

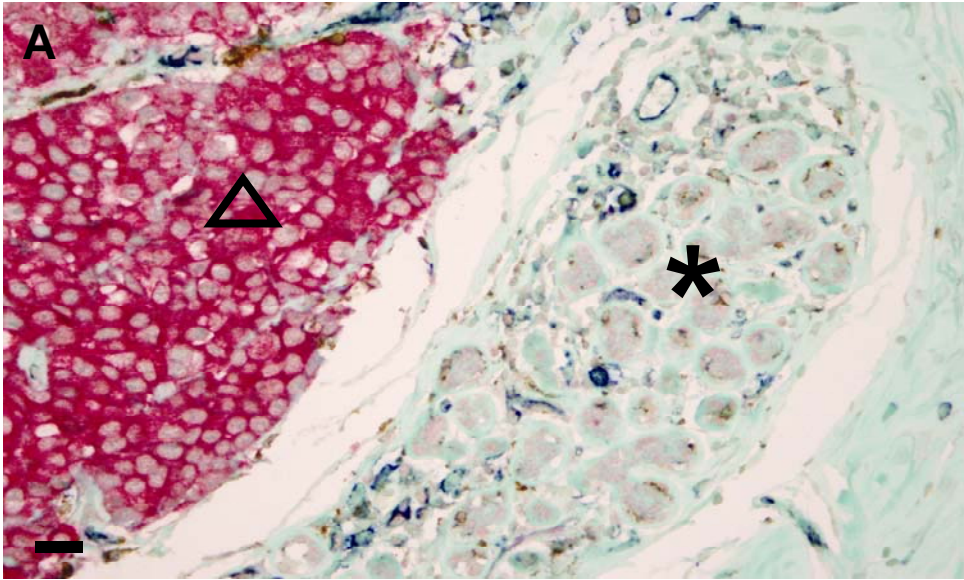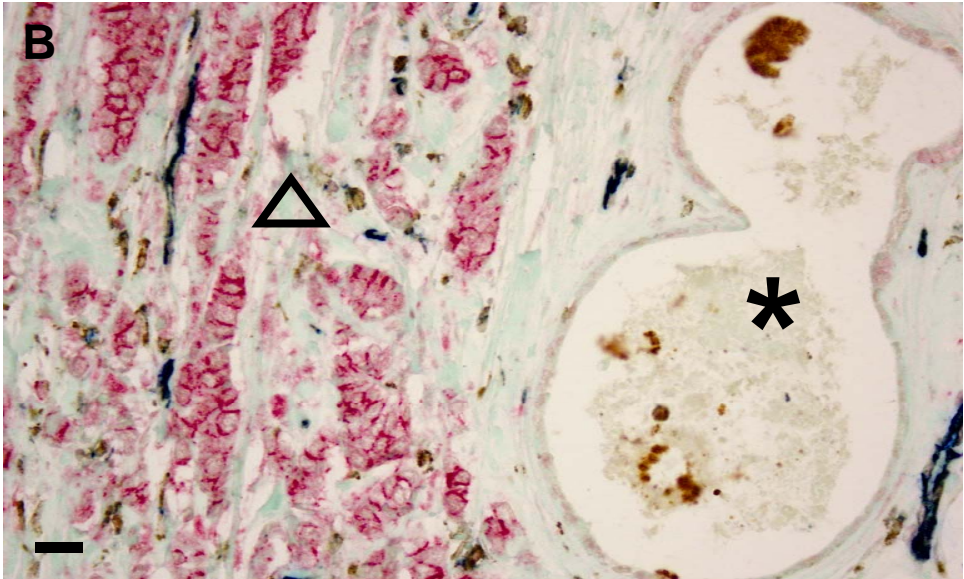

Supplemental Figure 1

**Supplemental Table 1. TMEM densities for each prognostic subgroup.**

|                                     | Metastatic Cohort<br>(n=30) |          | Non-metastatic Cohort<br>(n=30) |          |
|-------------------------------------|-----------------------------|----------|---------------------------------|----------|
|                                     | TMEM Density<br>Mean (SEM)  | <i>P</i> | TMEM Density<br>Mean (SEM)      | <i>P</i> |
| <u>Tumor differentiation</u>        |                             |          |                                 |          |
| Moderate                            | 100 (19)                    | } NS     | 44 (8.3)                        | } NS     |
| Poor                                | 120 (13)                    |          | 61.7 (8)                        |          |
| <u>Tumor size</u>                   |                             |          |                                 |          |
| <2 cm                               | 112 (19)                    | } NS     | 66 (14)                         | } NS     |
| 2-4 cm                              | 98.4 (15)                   |          | 54.5 (9.4)                      |          |
| >4 cm                               | 129 (24)                    |          | 51.3 (8.8)                      |          |
| <u>Lymph node metastasis</u>        |                             |          |                                 |          |
| Present                             | 98.9 (14)                   | } NS     | 57.4 (8.1)                      | } NS     |
| Absent                              | 137 (15)                    |          | 49.8 (9.9)                      |          |
| <u>No. lymph nodes positive</u>     |                             |          |                                 |          |
| <5 nodes                            | 105 (21)                    | } NS     | 62.4 (17)                       | } NS     |
| ≥5 nodes                            | 91 (18)                     |          | 54.5 (7.2)                      |          |
| <u>Lymphovascular invasion</u>      |                             |          |                                 |          |
| Present                             | 91.5 (12)                   | } NS     | 55.1 (11)                       | } NS     |
| Absent                              | 141 (19)                    |          | 54.2 (10)                       |          |
| <u>Estrogen receptor status</u>     |                             |          |                                 |          |
| Positive                            | 123 (15)                    | } NS     | 52.9 (7)                        | } NS     |
| Negative                            | 91.5 (13)                   |          | 57.2 (11)                       |          |
| <u>Progesterone receptor status</u> |                             |          |                                 |          |
| Positive                            | 118 (20)                    | } NS     | 48 (7.6)                        | } NS     |
| Negative                            | 108 (13)                    |          | 61 (9.1)                        |          |
| <u>Her2/neu overexpression</u>      |                             |          |                                 |          |
| Present                             | 118 (20)                    | } NS     | 37.1 (8)                        | } NS     |
| Absent                              | 109 (13)                    |          | 59.9 (7.1)                      |          |

SEM=standard error of the mean  
NS=not significant; p≥0.05

**Supplemental Table 1**
